# Supplementary material
Source: Springer Nature journal article supplement (https://www.springermedizin.de/resource/supplementary/12936_2013_2791_MOESM1_ESM.pdf/9544246)
Supplement: MOESM1 [file 9544246]

Additional file 1 Comparison of age, gender, and residential area of the total population and participants.

| Characteristics                |              | Population (%)<br>N= 3644 | Analysis group (%)<br>N=1509 | P value |
|--------------------------------|--------------|---------------------------|------------------------------|---------|
| Age range (median)<br>in years |              | 0-93 (22)                 | 4-79 (27)                    |         |
| Age (years)                    | 4-9          | 20.5                      | 16.6                         | 0.001   |
|                                | 10-14        | 13.4                      | 14.7                         | 0.221   |
|                                | 15-19        | 13.1                      | 10.7                         | 0.021   |
|                                | 20-29        | 12.8                      | 10.4                         | 0.018   |
|                                | 30-39        | 13.0                      | 12.7                         | 0.823   |
|                                | 40-49        | 12.8                      | 16.6                         | 0.000   |
|                                | 50 >         | 14.5                      | 18.2                         | 0.001   |
|                                | Total        | 100                       | 100                          |         |
| Age (years)                    | Young (< 20) | 47.0                      | 42.1                         | 0.001   |
|                                | Adult (≥ 20) | 53.0                      | 57.9                         |         |
|                                | Total        | 100                       | 100                          |         |
| Gender                         | Male         | 45.3                      | 41.7                         | 0.019   |
|                                | Female       | 54.7                      | 58.3                         |         |
|                                | Total        | 100                       | 100                          |         |
| Villages                       | Ndeturea     | 18.7                      | 21.2                         | 0.038   |
|                                | Ndorurea 1   | 33.2                      | 35.4                         | 0.122   |
|                                | Ndorurea     | 48.2                      | 43.4                         | 0.002   |
|                                | Total        | 100                       | 100                          |         |
